# Supplementary material for: Evolution of the multifaceted eukaryotic akirin gene family
Source: PubMed Central journal article supplement (PMC2660306; doi:10.1186/1471-2148-9-34), 2009-02-06
Supplement: 1471-2148-9-34-S5.pdf [file 1471-2148-9-34-S5.pdf]

1  
D.r(Akirin1) MACGATLKRS MEFE - ALLPQ SPKRRRCNPL PGTPTTSPSQ RCSLRPSTES PAH - - - SMSP QSMGGEHRLT - PEQIFQNI  
P.m(Akirin1) MACGATLKRS LDFEPLLSQ SPKRRRCNPL SPPSPSTSSGY LQAEPASLG ESHNYH - LHS PAAAA - - - RL TPEQVLANK  
P.p(Akirin1) MACGATLKRS MEFE - ALLPQ SPKRRRCNPL PGTPTTSPSQ RCGLRPSTES PAH - - - SMSP QSMAGEHRLT - PEQIFQNI  
T.r(Akirin1) MACGATLKRS MEFE - ALLPQ SPKRRRCNPL PGTPTTSPSQ RCNLRPPVDS PTH - - - SMSP SAIGGEHRLT - PEQIFQNL  
G.a(Akirin1) MACGATLKRS MEFE - ALLPQ SPKRRRCNPL PGTSGTSPSQ RCNLRPPVDS PAH - - - SMSP PAMGGEHRLT - PEQIFQNL  
O.I(Akirin1) MACGATLKRS MEFE - ALLPQ SPKRRRCNPL PGTPTTSPSQ RCNLRPP IDS PTH - - - SMSP QPIGGEHRLT PVEQIFQNL  
X.t(Akirin1) MACGATLKRS MEFE - ALMPQ SPKRRRCAPL PGSPATPSP - QRCAIRPEMQ QGQ - - - QQLP SPLGGDRRLT - PEQILQNIK  
M.m(Akirin1) MACGATLKRS MEFEAALLPG SPKRRRCAPL PGPTPGLRPA EPPPLQMQTP PAS - - - LQQP APPGSERRLP TPEQIFQNIK  
H.s(Akirin1) MACGATLKRS MEFEAALLPG SPKRRRCAPL PGPTPGLRPE PPPPFTQTP PQS - - - LQQP APPGSERRLP TPEQIFQNIK  
H.s(Akirin2) MACGATLKRS LDFDPLLSA SPKRRRCAPL SAPTSAASA TAASFSAAAA SPQKYLMEP SPFGDVSSRL TTEQILYNIK  
M.s(Akirin2) MACGATLKRS LDFDPLLSA SPKRRRCAPL SAPASAAAA AAA - - - SAAAA SPQKYLMEP SPFGDVSSRL TTEQILYNIK  
G.g(Akirin2) MACGATLKRS LDFDPLLSA SPKRRRCAPL SAPASAAAA - - - - - SSSFA SPQKYLMEP SPFGDVSSRL TTEQILYNIK  
X.t(Akirin2) MACGATLKRS LDFDPLLSA SPKRRRCAPL SPP - - - - - GP SPQKYLMEP SPFGDVSSRL TTEQILYNIK  
P.p(Akirin2[1]) MACGATLKRS LDFDPLLSA SPKRRRCAPL SPSSS - - - - - SA SPQKYLMEP SPFGDVSSRL TTEQILYNIK  
D.r(Akirin2[1]) MACGATLKRS LDFDPLMNP SPKRRRCAPM SPSSS - - - - - SA SPQKYLMEP SPFGDVSSRL TTEQILYNIK  
G.a(Akirin2[1]) MACGATLKRS LDFDPLMSQA SPKRRRCAP I ASP - - - - - VS SPQKYSRMEP SPFGDVSSRL TTEQILYNIK  
S.a(Akirin2[1]) MACGATLKRS LDFDPLMNP SPKRRRCAP I MSP - - - - - VS SPQKYLMEP SPFGDVSSRL TTEQILYNIK  
T.r(Akirin2[1]) MACGATLKRS LDFDPLMNP SPKRRRCAPM MSP - - - - - VS SPQKYLMEP SPFGDVSSRL TTEQILYNIK  
O.I(Akirin2[1]) MACGATLKRS LDFDPLMNP SPKRRRCAPM MSP - - - - - VS SPQKYLMEP SPFGDVSSRL TTEQILYNIK  
S.a(Akirin2[2]) MACGATLKRS LDFDPLMNP SPKRRRCAPM MSP - - - - - VS SPQKYLMEP SPFGDVSSRL TTEQILYNIK  
T.r(Akirin2[2]) MACGATLKRS LDFDPLMNP SPKRRRCAPM MSP - - - - - VS SPQKYLMEP SPFGDVSSRL TTEQILYNIK  
O.I(Akirin2[2]) MACGATLKRS LDFDPLMNP SPKRRRCAPM MSP - - - - - VS SPQKYLMEP SPFGDVSSRL TTEQILYNIK  
S.a(Akirin2[2]) MACGATLKRS LDFDPLMNP SPKRRRCAPM MSP - - - - - VS SPQKYLMEP SPFGDVSSRL TTEQILYNIK  
T.r(Akirin2[2]) MACGATLKRS LDFDPLMNP SPKRRRCAPM MSP - - - - - VS SPQKYLMEP SPFGDVSSRL TTEQILYNIK  
O.I(Akirin2[2]) MACGATLKRS LDFDPLMNP SPKRRRCAPM MSP - - - - - VS SPQKYLMEP SPFGDVSSRL TTEQILYNIK  
G.a(Akirin2[2]) MACGATLKRS LDFDPLMNP SPKRRRCAPM MSP - - - - - VS SPQKYLMEP SPFGDVSSRL TTEQILYNIK  
Echinoderm MAC - ATLKRT MDFDPLMSPT SPKRRRCIPV SHSSS - - - - - SPKRYLMEP SPFGDVSSRL TTEQILYNIK  
Cephal...ordate MAC - ATLKRT YELDPLHSR SKRPRRCMPM AGHSPNVSP - - - - - KSSLQ SPFPVTPRI SPGQLVAHIS  
Urochordate MACGATLKRS LDFDPLHSSP SPKRRRCIPV ITPSTPTS - - - - - PPRQK SSFPEVEPKL TSEQISQFIR  
Hemichordate MACGATLKRS LDFDPLHSSP SPKRRRCIPV ITPSTPTS - - - - - QRSPS SPFKNSAQL SSGQILKNIY  
PQTKAHLEP SPFGQVSPKL TPEQLNSVL

81  
D.r(Akirin1) QEYSRYQRRR QLEGA FNQTE PCSSTD IQSS SPALTSPTGA SSLKQDQPLF TLRQVGYLCE RL IKDHEEKM REEYEQ ILNT  
P.m(Akirin1) QEYSRYQRRR QLEGA FNQTE PCSSTD IQSS SASMQSGVSG DGRREQLF TLRQVGYLCE GLLRREVHI RQEYDQ ILST  
P.p(Akirin1) QEYSRYQRRR QLEGA FNQTE PCSSTD IQSS SPALTSPTGA STLKQDQPLF TLRQVGYLCE RL IKDHEEKM REEYEQ ILNT  
T.r(Akirin1) QEYSRYQRRR QLEGA FNQTE ACSSTDAPSP SSSLHAPPPA GASRKDQPSF TLKQVSYLCE RLLKDHEEKI REEYEQ ILNT  
G.a(Akirin1) QEYSRYQRRR QLEGA FNQTE ACSSTDAPSP SSSI NAPSP GASRKDQPSF TLKQVSYLCE RLLKDHEEKI REEYEQ ILNT  
O.I(Akirin1) QEYSRYQRRR QLEGA FNQAE ACSSTDAPSP SSSLTAPSP TLKQVSYLCE RLLKDHEEKI REEYEQ ILNT  
X.t(Akirin1) QEYSRYQRRR QLEGA FNQCE AGALNEVQAS CSSLTAPSPG SLVKKDQPTF SLRQVGYLCE RLLKDHEEKI REEYEQ ILNT  
M.m(Akirin1) QEYSRYQRRR HLEVVLSQ - S EACTSETQPS SSALTAPPGA FWMKKDQPTF TLRQVGYLCE RLLKDHEEKI REEYEQ ILNT  
H.s(Akirin1) QEYSRYQRRR HLEVVLSQ - S EACTSETQPS SSALTAPPGA FWMKKDQPTF TLRQVGYLCE RLLKDHEEKI REEYEQ ILNT  
H.s(Akirin2) QEYSRYQRRR HLEVVLSQ - S EACTSETQPS SSALTAPPGA FWMKKDQPTF TLRQVGYLCE RLLKDHEEKI REEYEQ ILNT  
M.s(Akirin2) QEYSRYQRRR HLEVVLSQ - S EACTSETQPS SSALTAPPGA FWMKKDQPTF TLRQVGYLCE RLLKDHEEKI REEYEQ ILNT  
G.g(Akirin2) QEYSRYQRRR HLEVVLSQ - S EACTSETQPS SSALTAPPGA FWMKKDQPTF TLRQVGYLCE RLLKDHEEKI REEYEQ ILNT  
X.t(Akirin2) QEYSRYQRRR HLEVVLSQ - S EACTSETQPS SSALTAPPGA FWMKKDQPTF TLRQVGYLCE RLLKDHEEKI REEYEQ ILNT  
P.p(Akirin2[1]) QEYSRYQRRR HLEVVLSQ - S EACTSETQPS SSALTAPPGA FWMKKDQPTF TLRQVGYLCE RLLKDHEEKI REEYEQ ILNT  
D.r(Akirin2[1]) QEYSRYQRRR HLEVVLSQ - S EACTSETQPS SSALTAPPGA FWMKKDQPTF TLRQVGYLCE RLLKDHEEKI REEYEQ ILNT  
G.a(Akirin2[1]) QEYSRYQRRR HLEVVLSQ - S EACTSETQPS SSALTAPPGA FWMKKDQPTF TLRQVGYLCE RLLKDHEEKI REEYEQ ILNT  
S.a(Akirin2[1]) QEYSRYQRRR HLEVVLSQ - S EACTSETQPS SSALTAPPGA FWMKKDQPTF TLRQVGYLCE RLLKDHEEKI REEYEQ ILNT  
T.r(Akirin2[1]) QEYSRYQRRR HLEVVLSQ - S EACTSETQPS SSALTAPPGA FWMKKDQPTF TLRQVGYLCE RLLKDHEEKI REEYEQ ILNT  
O.I(Akirin2[1]) QEYSRYQRRR HLEVVLSQ - S EACTSETQPS SSALTAPPGA FWMKKDQPTF TLRQVGYLCE RLLKDHEEKI REEYEQ ILNT  
S.a(Akirin2[2]) QEYSRYQRRR HLEVVLSQ - S EACTSETQPS SSALTAPPGA FWMKKDQPTF TLRQVGYLCE RLLKDHEEKI REEYEQ ILNT  
T.r(Akirin2[2]) QEYSRYQRRR HLEVVLSQ - S EACTSETQPS SSALTAPPGA FWMKKDQPTF TLRQVGYLCE RLLKDHEEKI REEYEQ ILNT  
O.I(Akirin2[2]) QEYSRYQRRR HLEVVLSQ - S EACTSETQPS SSALTAPPGA FWMKKDQPTF TLRQVGYLCE RLLKDHEEKI REEYEQ ILNT  
G.a(Akirin2[2]) QEYSRYQRRR HLEVVLSQ - S EACTSETQPS SSALTAPPGA FWMKKDQPTF TLRQVGYLCE RLLKDHEEKI REEYEQ ILNT  
Echinoderm HEWRRIRRRK RLEESYSSEA PSSSEM VETS GCFSPPSLQ QTQTKDQPMF TLRQVGYLCE QMLKEQESRI REEYDKALSC  
Cephal...ordate DEYKRMHRRK RLWGATDSV QSAASP SHHG SLSPMSPTG SP INKDKPLF SMRQVSMICE RMIKERDQV REEYDKALSC  
Urochordate DEYKRMHRRK RLWGATDSV QSAASP SHHG SLSPMSPTG SP INKDKPLF SMRQVSMICE RMIKERDQV REEYDKALSC  
Hemichordate LEYKRMQRRK KLATAFTSGT STYPAPGPSH QQQQSAAPS SPSRREQPIF TLRQVGYLCE RLLKEREKI KAEDYKTLTC

161  
D.r(Akirin1) KLAEQYESFV KFTQDQIMRR YGAR PASYVS  
P.m(Akirin1) KLAEQYESFV KFTQDQIMRR YGAR PASYVS  
P.p(Akirin1) KLAEQYESFV KFTQDQIMRR YGAR PASYVS  
T.r(Akirin1) KLAEQYESFV KFTQDQIMRR YGAR PASYVS  
G.a(Akirin1) KLAEQYESFV KFTQDQIMRR YGAR PASYVS  
O.I(Akirin1) KLAEQYESFV KFTQDQIMRR YGAR PASYVS  
X.t(Akirin1) KLAEQYESFV KFTQDQIMRR YGAR PASYVS  
M.m(Akirin1) KLAEQYESFV KFTQDQIMRR YGAR PASYVS  
H.s(Akirin1) KLAEQYESFV KFTQDQIMRR YGAR PASYVS  
H.s(Akirin2) KLAEQYDAFV KFTQDQIMRR YGAR PASYVS  
M.s(Akirin2) KLAEQYDAFV KFTQDQIMRR YGAR PASYVS  
G.g(Akirin2) KLAEQYDAFV KFTQDQIMRR YGAR PASYVS  
X.t(Akirin2) KLAEQYDAFV KFTQDQIMRR YGAR PASYVS  
P.p(Akirin2[1]) KLAEQYDAFV KFTQDQIMRR YGAR PASYVS  
D.r(Akirin2[1]) KLAEQYDAFV KFTQDQIMRR YGAR PASYVS  
G.a(Akirin2[1]) KLAEQYDAFV KFTQDQIMRR YGAR PASYVS  
S.a(Akirin2[1]) KLAEQYDAFV KFTQDQIMRR YGAR PASYVS  
T.r(Akirin2[1]) KLAEQYDAFV KFTQDQIMRR YGAR PASYVS  
O.I(Akirin2[1]) KLAEQYDAFV KFTQDQIMRR YGAR PASYVS  
S.a(Akirin2[2]) KLAEQYDAFV KFTQDQIMRR YGAR PASYVS  
T.r(Akirin2[2]) KLAEQYDAFV KFTQDQIMRR YGAR PASYVS  
O.I(Akirin2[2]) KLAEQYDAFV KFTQDQIMRR YGAR PASYVS  
G.a(Akirin2[2]) KLAEQYDAFV KFTQDQIMRR YGAR PASYVS  
Echinoderm KLAEQYDAFV KFNQDQIQRR FTSTSMSYVS  
Cephal...ordate KLAEQYDAFV RFNQDYLRQ FAETAASYVS  
Urochordate KLAEQYDAFV KFNQDQIQRR ISEHPASYVS  
Hemichordate KLAEQYDAFV KFNQDQIQRR FGETAASYVS

190  
D.r(Akirin1) KLAEQYESFV KFTQDQIMRR YGAR PASYVS  
P.m(Akirin1) KLAEQYESFV KFTQDQIMRR YGAR PASYVS  
P.p(Akirin1) KLAEQYESFV KFTQDQIMRR YGAR PASYVS  
T.r(Akirin1) KLAEQYESFV KFTQDQIMRR YGAR PASYVS  
G.a(Akirin1) KLAEQYESFV KFTQDQIMRR YGAR PASYVS  
O.I(Akirin1) KLAEQYESFV KFTQDQIMRR YGAR PASYVS  
X.t(Akirin1) KLAEQYESFV KFTQDQIMRR YGAR PASYVS  
M.m(Akirin1) KLAEQYESFV KFTQDQIMRR YGAR PASYVS  
H.s(Akirin1) KLAEQYESFV KFTQDQIMRR YGAR PASYVS  
H.s(Akirin2) KLAEQYDAFV KFTQDQIMRR YGAR PASYVS  
M.s(Akirin2) KLAEQYDAFV KFTQDQIMRR YGAR PASYVS  
G.g(Akirin2) KLAEQYDAFV KFTQDQIMRR YGAR PASYVS  
X.t(Akirin2) KLAEQYDAFV KFTQDQIMRR YGAR PASYVS  
P.p(Akirin2[1]) KLAEQYDAFV KFTQDQIMRR YGAR PASYVS  
D.r(Akirin2[1]) KLAEQYDAFV KFTQDQIMRR YGAR PASYVS  
G.a(Akirin2[1]) KLAEQYDAFV KFTQDQIMRR YGAR PASYVS  
S.a(Akirin2[1]) KLAEQYDAFV KFTQDQIMRR YGAR PASYVS  
T.r(Akirin2[1]) KLAEQYDAFV KFTQDQIMRR YGAR PASYVS  
O.I(Akirin2[1]) KLAEQYDAFV KFTQDQIMRR YGAR PASYVS  
S.a(Akirin2[2]) KLAEQYDAFV KFTQDQIMRR YGAR PASYVS  
T.r(Akirin2[2]) KLAEQYDAFV KFTQDQIMRR YGAR PASYVS  
O.I(Akirin2[2]) KLAEQYDAFV KFTQDQIMRR YGAR PASYVS  
G.a(Akirin2[2]) KLAEQYDAFV KFTQDQIMRR YGAR PASYVS  
Echinoderm KLAEQYDAFV KFNQDQIQRR FTSTSMSYVS  
Cephal...ordate KLAEQYDAFV RFNQDYLRQ FAETAASYVS  
Urochordate KLAEQYDAFV KFNQDQIQRR ISEHPASYVS  
Hemichordate KLAEQYDAFV KFNQDQIQRR FGETAASYVS
